# Supplementary material for: Molecular simulations of zwitterlation-induced conformation and dynamics variation of glucagon-like peptide-1 and insulin
Source: Royal Society of Chemistry journal article supplement (doi:10.1039/d1tb02561a), 2022-01-01
Supplement: d1tb02561a1.pdf [file d1tb02561a1.pdf]

**Molecular Simulations of Zwitterlation-induced Conformation and Dynamics Variation of Glucagon-like Peptide-1 and Insulin**

Qi Qiao<sup>a1</sup>, Lirong Cai<sup>a1</sup> and Qing Shao<sup>a\*</sup>

<sup>a</sup>Chemical and Materials Engineering Department, University of Kentucky, Lexington, 40506 Kentucky, USA

**Table S1.** The sequence of GLP-1.

|       | Sequence                      |
|-------|-------------------------------|
| GLP-1 | HAEGTFTSDVSSYLEGQAAKEFIAWLKGR |

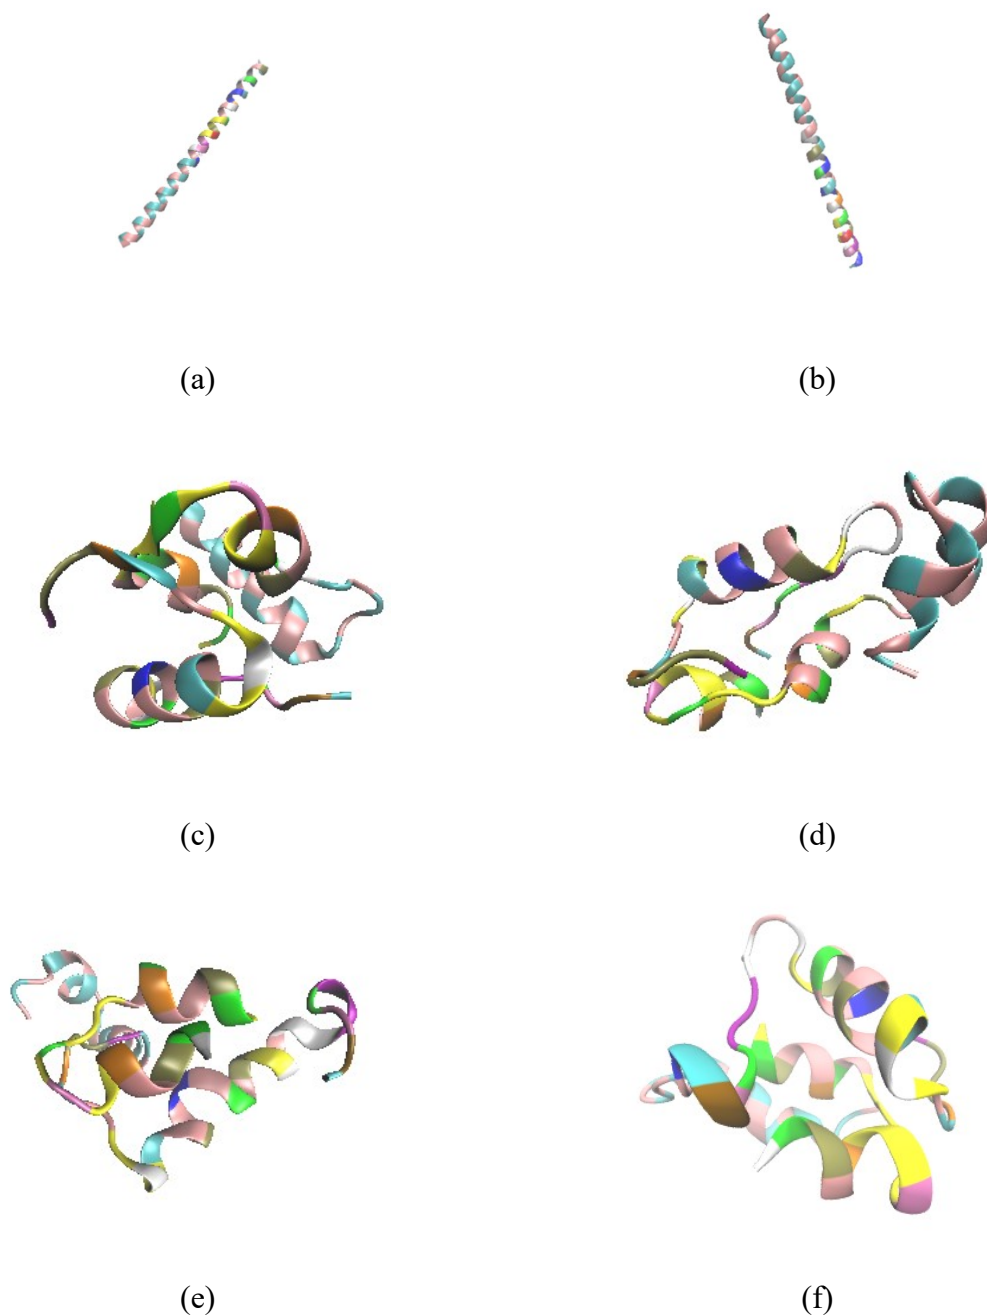

**Figure S1.** The Rosetta predicted structure of (a) (EK)<sub>10</sub>-N-GLP-1, (b) GLP-1-C-(EK)<sub>10</sub>, (c) (EK)<sub>10</sub>-N-insulin-A, (d) insulin-A-C-(EK)<sub>10</sub>, (e) (EK)<sub>10</sub>-N-insulin-B, (f) insulin-B-C-(EK)<sub>10</sub>. These structures predicted by Rosetta Server, colored by residue name. The protein: new-cartoon model, colored based on the residue name.

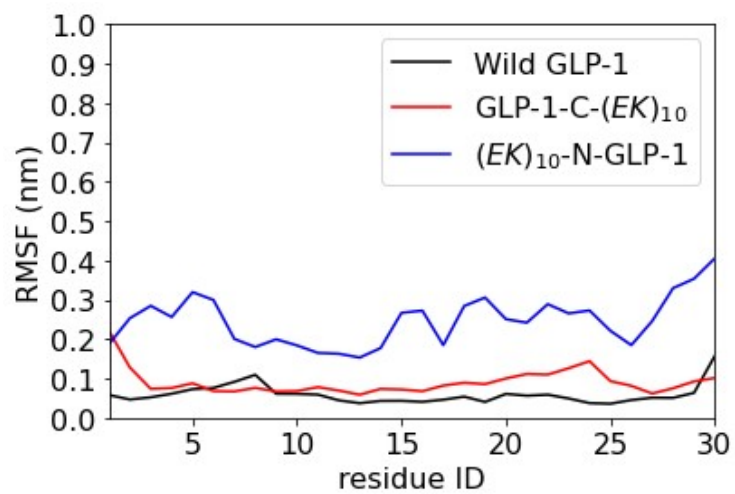

(a)

**Figure S2.** RMSF of C<sub>α</sub> atoms on GLP-1

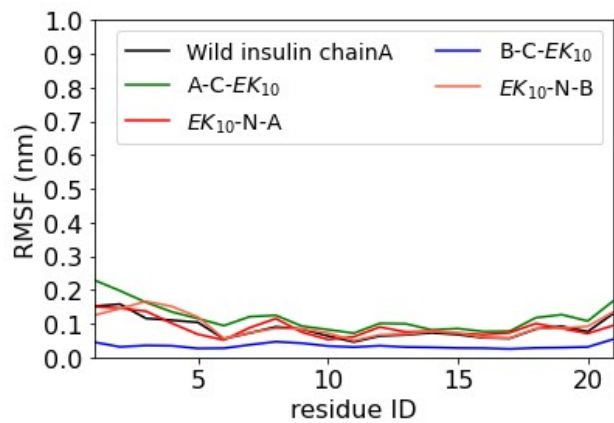

(a)

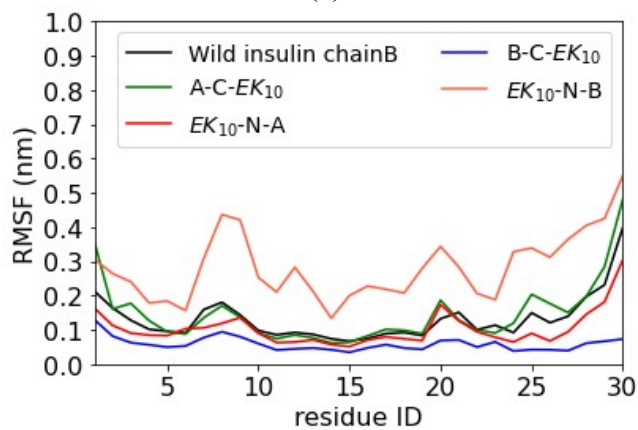

(b)

**Figure S3.** RMSF of C $\alpha$  atoms on insulin (a) Chain A and (b) Chain B

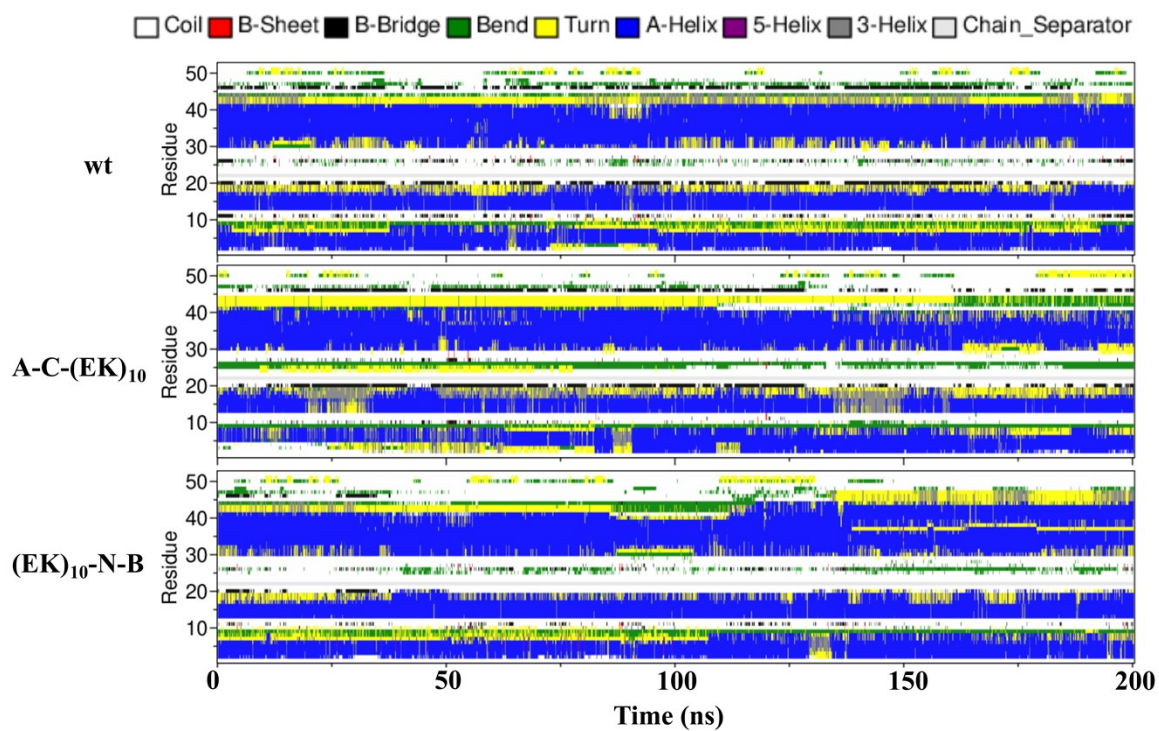

**Figure S4.** Secondary structure analysis of residues verse simulation time for insulin protein and the protein-peptide conjugates.
